# Supplementary material for: Advances in the modification of the contradictory relationship between piezoelectricity and Curie temperature: simultaneous realization of large piezoelectricity and high Curie temperature in potassium sodium niobate-based ferroelectrics
Source: Royal Society of Chemistry journal article supplement (doi:10.1039/d0tc01888k), 2020-01-01
Supplement: d0tc01888k1.pdf [file d0tc01888k1.pdf]

## Supporting Information

### Advances in modification of contradictory relationship: Simultaneously realizing large piezoelectricity and high Curie temperature in potassium sodium niobate based ferroelectrics

Jian Ma<sup>1</sup>, Juan Wu<sup>1</sup>, Bo Wu<sup>1, 2\*</sup> and Wenjuan Wu<sup>2</sup>

<sup>1</sup>*Sichuan province key laboratory of information materials, Southwest Minzu University, Chengdu 610041, P. R. China*

<sup>2</sup>*Sichuan Province Key Laboratory of Information Materials and Devices Application, Chengdu University of Information Technology, Chengdu 610225, P. R. China*

\*Corresponding author. Email: [wubo7788@126.com](mailto:wubo7788@126.com) (B. Wu.)

**Table S1:** Crystal structure parameters of KNNS<sub>x</sub>-BNZ-BF ceramics:  $x=0$  and 0.03.

| Parameters  | $x=0$   |         | $x=0.03$ |         |
|-------------|---------|---------|----------|---------|
| Symmetry    | R Phase | T Phase | R Phase  | T Phase |
| proportion  | 68.53%  | 31.47%  | 28.26%   | 71.74%  |
| Space group | $R3m$   | $P4mm$  | $R3m$    | $P4mm$  |
| a(Å)        | 3.9678  | 3.9439  | 3.9572   | 3.9613  |
| b(Å)        | 3.9678  | 3.9439  | 3.9572   | 3.9613  |
| c(Å)        | 3.9678  | 4.0027  | 3.9572   | 3.9987  |
| Alpha(°)    | 89.9815 | 90      | 89.9533  | 90      |

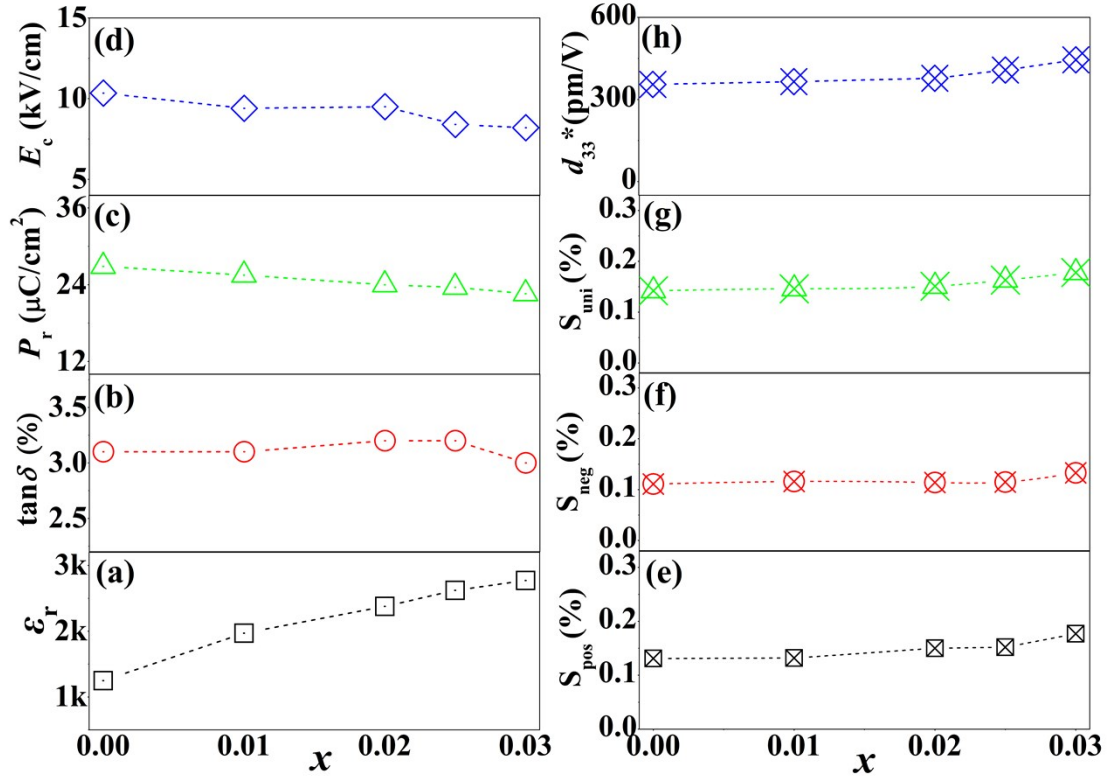

**Fig.S1:** (a)-(b) dielectric ( $\epsilon_r$ ,  $\tan \delta$ ), (c)-(d) ferroelectric ( $P_r$ ,  $E_c$ ), (e)-(g) strain ( $S_{\text{pos}}$ ,  $S_{\text{neg}}$ ,  $S_{\text{uni}}$ ), and (h)  $d_{33}^*$  properties of  $\text{KNNS}_x\text{-BNZ-BF}$  ceramics.

Fig.S1(a)-(b) shows dielectric ( $\epsilon_r$ ,  $\tan \delta$ ) properties of  $\text{KNNS}_x\text{-BNZ-BF}$  ceramics. The  $\epsilon_r$  almost linearly increases from 1249 to 2770 with increasing  $\text{Sb}^{5+}$ , which benefits from the  $T_{\text{R-T}}$  closing to the room temperature by adding  $\text{Sb}^{5+}$ . The  $\tan \delta$  of all ceramics is around 3%~3.2%, and a lower  $\tan \delta$  (~3%) is obtained in the ceramics with  $x=0.03$ . The ferroelectric ( $P_r$ ,  $E_c$ ) properties of  $\text{KNNS}_x\text{-BNZ-BF}$  ceramics is shown in Fig.S1(c)-(d), and the corresponding parameters are extracted from the  $P$ - $E$  loops [See Fig. S2]. Recent publications reported that KNN-based ceramics with doping  $\text{Sb}^{5+}$  will degrade the ferroelectric properties, which lead to a slow degradation of  $P_r$  as a function of

$\text{Sb}^{5+}$ .<sup>1-3</sup> The  $E_c$  presents a slight softening change with increasing  $\text{Sb}^{5+}$ , and a lower  $E_c$  is obtained in the ceramics with  $x=0.03$ . As we know, a low

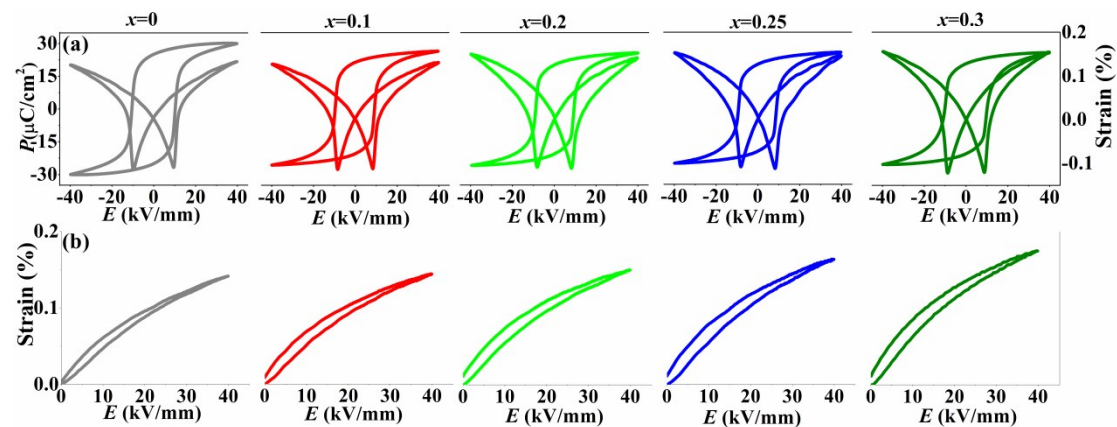

**Fig.S2:** (a) Ferroelectric loops, (b) Bipolar strain loops, and (c) Unipolar strain curves of  $\text{KNNS}_x\text{-BNZ-BF}$  ceramics.

energy barrier usually exists in the ceramics with multiphase coexistence, benefiting to making domain switching and polarization rotation easier.<sup>4, 5</sup> The decreasing  $E_c$  can be ascribed to the multiphase structure closing to the room temperature. The strain ( $S_{\text{pos}}$ ,  $S_{\text{neg}}$ ,  $S_{\text{uni}}$ ) properties as a function of  $\text{Sb}^{5+}$  are plotted in Fig.S1(e)-(g), measured at 1 Hz and 40 kV/cm, the  $S_{\text{pos}}$  and  $S_{\text{neg}}$  are extracted from  $S$ - $E$  loops and  $S_{\text{uni}}$  is derived from unipolar strain curves[See Fig. S2].  $S_{\text{pos}}$  monotonely increases ( $S_{\text{pos}}$ : 0.131%→0.177%) with adding  $\text{Sb}^{5+}$ , gaining a higher strain ( $S_{\text{pos}} \sim 0.177\%$ ) value at R-T phase zone near the room temperature [See Fig. S1(e)].  $S_{\text{neg}}$  ( $S_{\text{neg}}$ : 0.111%→0.133%) have the similar variation with increasing  $\text{Sb}^{5+}$  [See Fig. S1(f)], indicating that non-180° domains (eg., 71°, 109° and 90°) increase in the R-T phase boundary.<sup>6</sup> As for unipolar strain

( $S_{\text{uni}}$ :0.142%-0.178%), has a similar trend to  $S_{\text{pos}}$  as the increase of  $\text{Sb}^{5+}$ [See Fig. S1(g)], which can be explained by same contributions (eg., intrinsic piezoelectric response strain, extrinsic domain switching strain) of the  $S_{\text{pos}}$  and  $S_{\text{uni}}$ .  $d_{33}^* (S_{\text{uni}}/E_{\text{max}})$  is plotted in Fig.S1(g), the change trend highly matched the  $S_{\text{uni}}$ , that is, the  $d_{33}^*$  increases from 355 pm/V to 445pm/V as a function of  $\text{Sb}^{5+}$ . Considering the relatively high  $S_{\text{neg}}$ ,  $S_{\text{uni}}$  and  $S_{\text{pos}}$  in the R-T phase boundary, the strain properties mainly originate from intrinsic and extrinsic contribution, such as the piezoelectric response strain, domain switching strain.

## References

1. J. G. Wu, D. Q. Xiao, J. G. Zhu. Chem. Rev. 2015, 115, 2559.
2. J. Wu, H. Tao, Y. Yuan, X. Lv, X. Wang, X. Lou, RSC Adv., 2015, 5, 14575.
3. Y. Yuan, J. Wu, T. Hong, X. Lv, X. Wang, and X. Lou, J. Appl. Phys., 2015, 117, 084103.
4. B. Wu, H. Wu, J. Wu, D. Xiao, J. Zhu, S. Pennycook, J. Am. Chem. Soc. 2016, 138, 15459.
5. H. Tao, H. Wu, Y. Liu, Y. Zhang, J. Wu, F. Li, X. Lyu, C. Zhao, D. Xiao, J. Zhu, S. Pennycook, J. Am. Chem. Soc., 2019, 141, 13987.
6. P. Marton, I. Rychetsky, J. Hlinka, Phys. Rev. B: Condens. Matter Mater. Phys., 2010, 81, 144125
